# Supplementary material for: Proxy panels enable privacy-aware outsourcing of genotype imputation
Source: HighWire-hosted journal article supplement (doi:10.1101/gr.278934.124), 2025-01-10
Supplement: Supplemental_Figure_S2.pdf [file Supplemental_Figure_S2.pdf]

(S2)

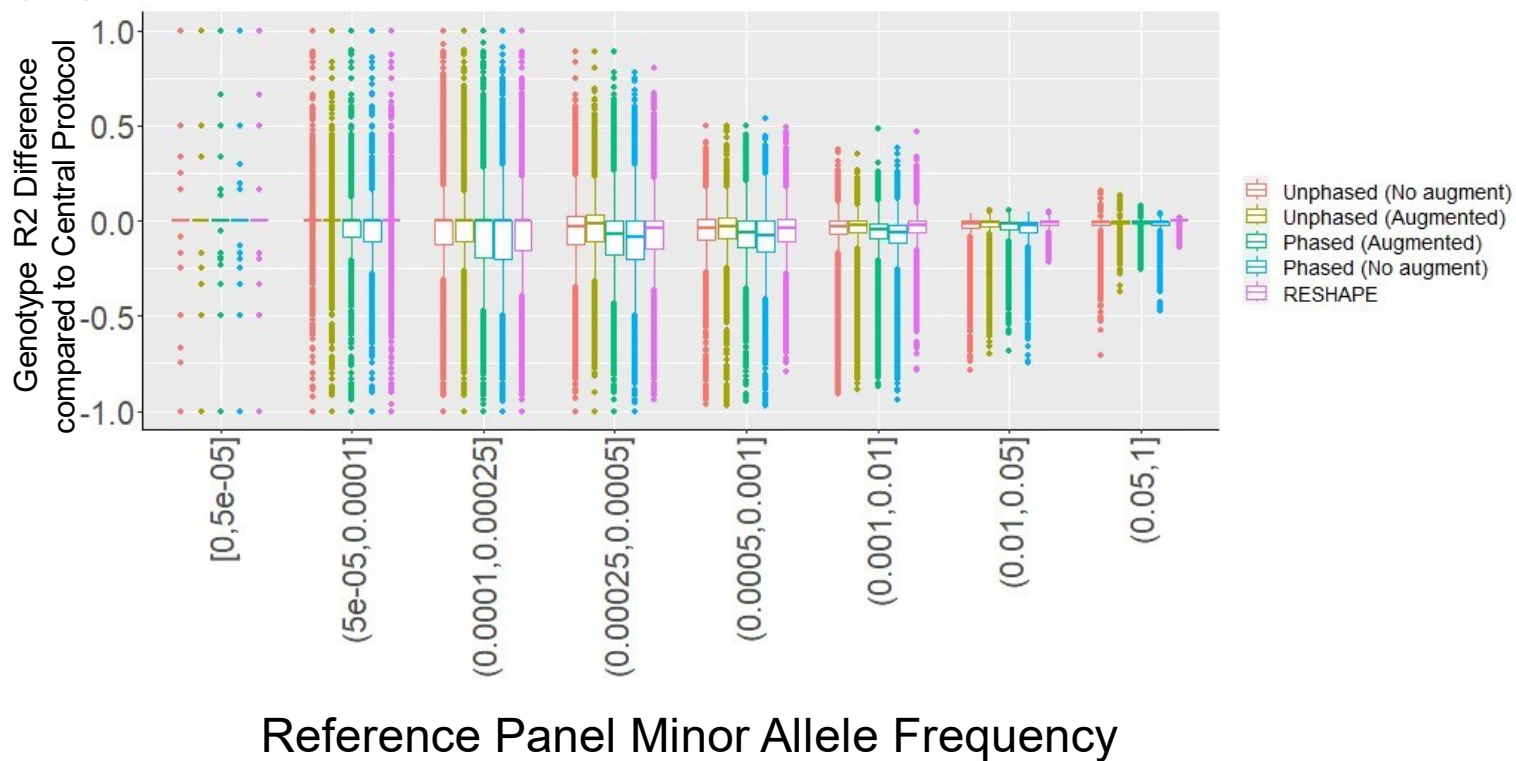

**Supplemental Figure S2.** Distribution of genotype R2 difference between each protocol with the Central protocol using randomly split Haplotype Reference Consortium dataset. The variants are stratified by minor allele frequency on the reference panel.
