# Supplementary material for: Proxy panels enable privacy-aware outsourcing of genotype imputation
Source: HighWire-hosted journal article supplement (doi:10.1101/gr.278934.124), 2025-01-10
Supplement: Supplemental_Figure_S3.pdf [file Supplemental_Figure_S3.pdf]

**(S3a)**  
Illumina Infinium  
Diversity

**(S3b)**  
Illumina Infinium  
Screening

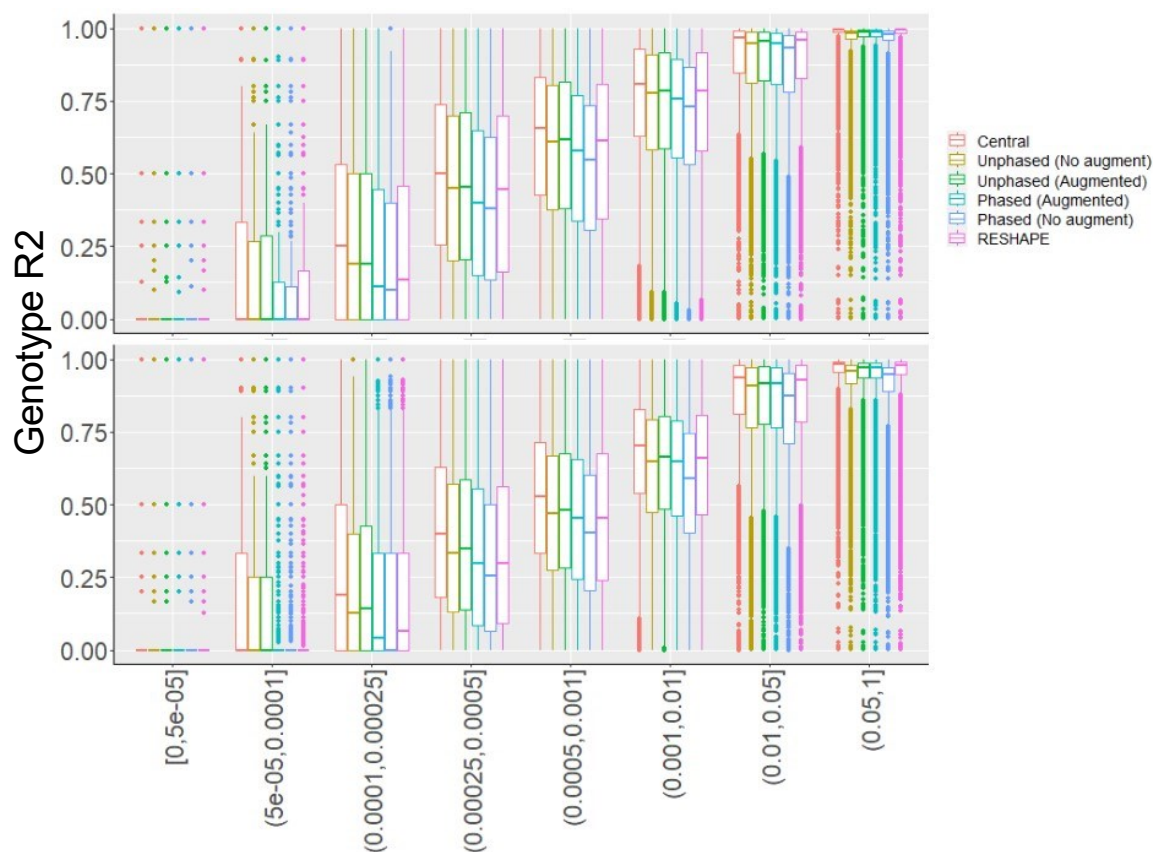

Reference Panel Minor Allele Frequency

**Supplemental Figure S3.** Imputation accuracy (genotype R2) for typed variants on Illumina Infinium Diversity and Infinium Screening platforms using randomly split Haplotype Reference Consortium dataset. The variants are stratified by minor allele frequency on the corresponding reference panel.
