# Supplementary material for: Proxy panels enable privacy-aware outsourcing of genotype imputation
Source: HighWire-hosted journal article supplement (doi:10.1101/gr.278934.124), 2025-01-10
Supplement: Supplemental_Figure_S4.pdf [file Supplemental_Figure_S4.pdf]

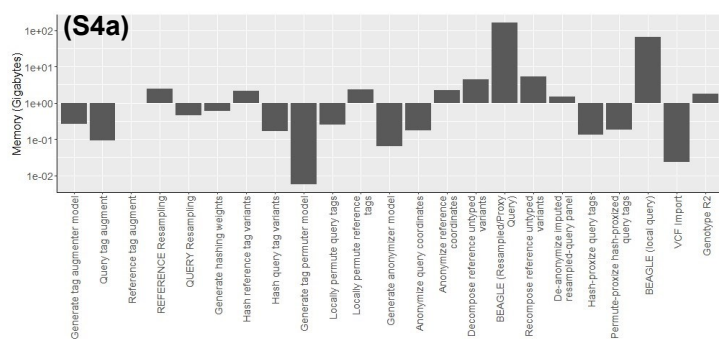

## Phased Query Protocol (Memory)

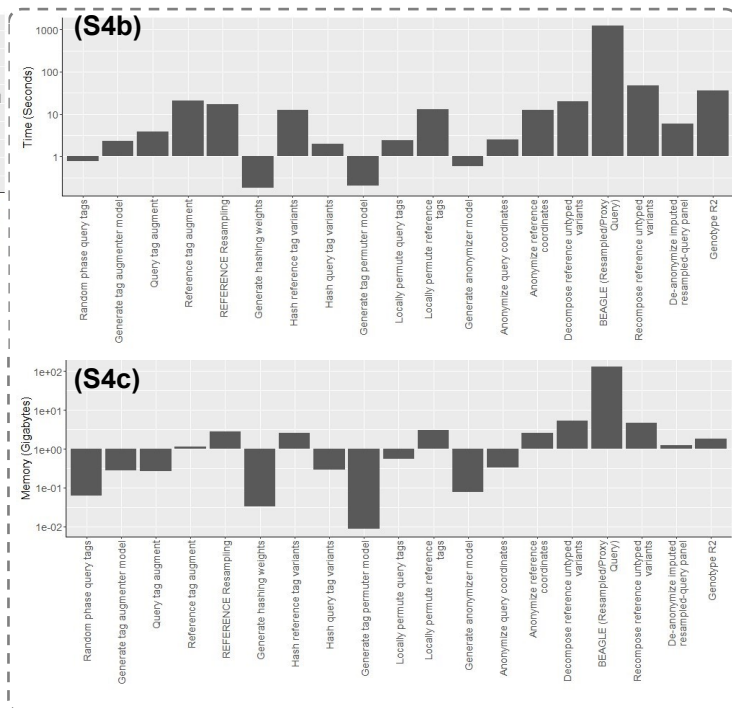

## Unphased Query Protocol

**Supplemental Figure S4.** Time/Memory usage of ProxyTyper's imputation protocols. **(a)** Memory usage of phased query protocol. Each bar shows the memory usage (in Gigabytes of main memory) of the corresponding step. **(b)** Time usage (in seconds) of each step of the unphased query protocol. **(c)** Memory usage of the unphased query protocol.
