# Supplementary material for: Proxy panels enable privacy-aware outsourcing of genotype imputation
Source: HighWire-hosted journal article supplement (doi:10.1101/gr.278934.124), 2025-01-10
Supplement: Supplemental_Table_S1.pdf [file Supplemental_Table_S1.pdf]

**Supplemental Table S1.** Accuracy statistics for randomly split HRC panel. MAF range and mean/median/standard deviation (S.D) of genotype R2 are shown in the columns.

| PROTOCOL              | MAF              | MEAN     | MEDIAN | S.D.     |
|-----------------------|------------------|----------|--------|----------|
| CENTRAL               | [0,5e-05]        | 0.062972 | 0      | 0.230872 |
| UNPHASED (NO AUGMENT) | [0,5e-05]        | 0.051237 | 0      | 0.209658 |
| UNPHASED (AUGMENTED)  | [0,5e-05]        | 0.048074 | 0      | 0.199794 |
| PHASED (AUGMENTED)    | [0,5e-05]        | 0.022232 | 0      | 0.137568 |
| PHASED (NO AUGMENT)   | [0,5e-05]        | 0.031435 | 0      | 0.166595 |
| RESHAPE               | [0,5e-05]        | 0.034167 | 0      | 0.17165  |
| CENTRAL               | (5e-05,0.0001]   | 0.20893  | 0      | 0.302913 |
| UNPHASED (NO AUGMENT) | (5e-05,0.0001]   | 0.173236 | 0      | 0.279238 |
| UNPHASED (AUGMENTED)  | (5e-05,0.0001]   | 0.174911 | 0      | 0.281598 |
| PHASED (AUGMENTED)    | (5e-05,0.0001]   | 0.132568 | 0      | 0.254929 |
| PHASED (NO AUGMENT)   | (5e-05,0.0001]   | 0.127843 | 0      | 0.252102 |
| RESHAPE               | (5e-05,0.0001]   | 0.146489 | 0      | 0.270426 |
| CENTRAL               | (0.0001,0.00025] | 0.324257 | 0.2499 | 0.312571 |
| UNPHASED (NO AUGMENT) | (0.0001,0.00025] | 0.277137 | 0.1763 | 0.29738  |
| UNPHASED (AUGMENTED)  | (0.0001,0.00025] | 0.285161 | 0.1998 | 0.300703 |
| PHASED (AUGMENTED)    | (0.0001,0.00025] | 0.239542 | 0.111  | 0.289518 |
| PHASED (NO AUGMENT)   | (0.0001,0.00025] | 0.229679 | 0.0999 | 0.285477 |
| RESHAPE               | (0.0001,0.00025] | 0.255896 | 0.1249 | 0.300271 |
| CENTRAL               | (0.00025,0.0005] | 0.497144 | 0.4999 | 0.293036 |
| UNPHASED (NO AUGMENT) | (0.00025,0.0005] | 0.447736 | 0.4443 | 0.291736 |
| UNPHASED (AUGMENTED)  | (0.00025,0.0005] | 0.457533 | 0.4499 | 0.293353 |
| PHASED (AUGMENTED)    | (0.00025,0.0005] | 0.412442 | 0.3997 | 0.291657 |
| PHASED (NO AUGMENT)   | (0.00025,0.0005] | 0.399227 | 0.3807 | 0.290379 |
| RESHAPE               | (0.00025,0.0005] | 0.43107  | 0.4181 | 0.305777 |
| CENTRAL               | (0.0005,0.001]   | 0.621626 | 0.6624 | 0.2604   |
| UNPHASED (NO AUGMENT) | (0.0005,0.001]   | 0.573084 | 0.6047 | 0.268562 |
| UNPHASED (AUGMENTED)  | (0.0005,0.001]   | 0.583083 | 0.617  | 0.270586 |
| PHASED (AUGMENTED)    | (0.0005,0.001]   | 0.546025 | 0.5783 | 0.273325 |
| PHASED (NO AUGMENT)   | (0.0005,0.001]   | 0.528156 | 0.5618 | 0.272035 |
| RESHAPE               | (0.0005,0.001]   | 0.569436 | 0.6121 | 0.286405 |
| CENTRAL               | (0.001,0.01]     | 0.757697 | 0.8142 | 0.208326 |
| UNPHASED (NO AUGMENT) | (0.001,0.01]     | 0.716735 | 0.768  | 0.224874 |
| UNPHASED (AUGMENTED)  | (0.001,0.01]     | 0.726481 | 0.7831 | 0.22511  |
| PHASED (AUGMENTED)    | (0.001,0.01]     | 0.700683 | 0.7571 | 0.233323 |
| PHASED (NO AUGMENT)   | (0.001,0.01]     | 0.683743 | 0.7364 | 0.233685 |
| RESHAPE               | (0.001,0.01]     | 0.721944 | 0.7896 | 0.237459 |
| CENTRAL               | (0.01,0.05]      | 0.891892 | 0.9623 | 0.139612 |
| UNPHASED (NO AUGMENT) | (0.01,0.05]      | 0.863341 | 0.9385 | 0.161181 |
| UNPHASED (AUGMENTED)  | (0.01,0.05]      | 0.870687 | 0.9472 | 0.157736 |
| PHASED (AUGMENTED)    | (0.01,0.05]      | 0.859945 | 0.9399 | 0.165583 |
| PHASED (NO AUGMENT)   | (0.01,0.05]      | 0.846851 | 0.9217 | 0.17163  |
| RESHAPE               | (0.01,0.05]      | 0.874575 | 0.9562 | 0.160557 |
| CENTRAL               | (0.05,1]         | 0.98246  | 0.9958 | 0.054243 |
| UNPHASED (NO AUGMENT) | (0.05,1]         | 0.963762 | 0.9826 | 0.065466 |
| UNPHASED (AUGMENTED)  | (0.05,1]         | 0.972466 | 0.9896 | 0.061211 |
| PHASED (AUGMENTED)    | (0.05,1]         | 0.972207 | 0.9894 | 0.063144 |
| PHASED (NO AUGMENT)   | (0.05,1]         | 0.96269  | 0.9834 | 0.069436 |
| RESHAPE               | (0.05,1]         | 0.980076 | 0.9954 | 0.060488 |
