# Supplementary material for: Proxy panels enable privacy-aware outsourcing of genotype imputation
Source: HighWire-hosted journal article supplement (doi:10.1101/gr.278934.124), 2025-01-10
Supplement: Supplemental_Table_S2.pdf [file Supplemental_Table_S2.pdf]

**Supplemental Table S2.** Accuracy statistics for imputation of the European (EUR) specific variant genotypes from The 1000 Genomes Project using HRC panel as the reference. MAF range and mean/median/standard deviation (S.D) of genotype R2 are shown in the columns.

| POPULATION | PROTOCOL              | MAF          | MEAN R2  | MEDIAN  | S.D.     |
|------------|-----------------------|--------------|----------|---------|----------|
| EUR        | Central               | [0,0.001]    | 0.374936 | 0.1662  | 0.422141 |
| EUR        | Unphased (No augment) | [0,0.001]    | 0.310448 | 0       | 0.40146  |
| EUR        | Unphased (Augmented)  | [0,0.001]    | 0.308705 | 0       | 0.400152 |
| EUR        | Phased (Augmented)    | [0,0.001]    | 0.280831 | 0       | 0.391209 |
| EUR        | Phased (No augment)   | [0,0.001]    | 0.270931 | 0       | 0.387035 |
| EUR        | RESHAPE               | [0,0.001]    | 0.288262 | 0       | 0.395775 |
| EUR        | Central               | (0.001,0.01] | 0.500927 | 0.4996  | 0.28862  |
| EUR        | Unphased (No augment) | (0.001,0.01] | 0.430114 | 0.4005  | 0.284271 |
| EUR        | Unphased (Augmented)  | (0.001,0.01] | 0.435406 | 0.4156  | 0.285804 |
| EUR        | Phased (Augmented)    | (0.001,0.01] | 0.419813 | 0.3989  | 0.28545  |
| EUR        | Phased (No augment)   | (0.001,0.01] | 0.406513 | 0.3748  | 0.284525 |
| EUR        | RESHAPE               | (0.001,0.01] | 0.437964 | 0.4279  | 0.289544 |
| EUR        | Central               | (0.01,0.05]  | 0.624451 | 0.6332  | 0.226512 |
| EUR        | Unphased (No augment) | (0.01,0.05]  | 0.555158 | 0.5504  | 0.231254 |
| EUR        | Unphased (Augmented)  | (0.01,0.05]  | 0.566967 | 0.5648  | 0.234693 |
| EUR        | Phased (Augmented)    | (0.01,0.05]  | 0.556347 | 0.5518  | 0.233153 |
| EUR        | Phased (No augment)   | (0.01,0.05]  | 0.531077 | 0.52455 | 0.229672 |
| EUR        | RESHAPE               | (0.01,0.05]  | 0.57067  | 0.5702  | 0.236159 |
| EUR        | Central               | (0.05,1]     | 0.904111 | 0.9668  | 0.14612  |
| EUR        | Unphased (No augment) | (0.05,1]     | 0.86281  | 0.9259  | 0.161607 |
| EUR        | Unphased (Augmented)  | (0.05,1]     | 0.879533 | 0.9456  | 0.161177 |
| EUR        | Phased (Augmented)    | (0.05,1]     | 0.875584 | 0.94325 | 0.163104 |
| EUR        | Phased (No augment)   | (0.05,1]     | 0.844606 | 0.9151  | 0.175609 |
| EUR        | RESHAPE               | (0.05,1]     | 0.885112 | 0.9542  | 0.160612 |
