# Supplementary material for: Proxy panels enable privacy-aware outsourcing of genotype imputation
Source: HighWire-hosted journal article supplement (doi:10.1101/gr.278934.124), 2025-01-10
Supplement: Supplemental_Table_S3.pdf [file Supplemental_Table_S3.pdf]

**Supplemental Table S3.** Accuracy statistics for imputation of the African (AFR) specific variant genotypes from The 1000 Genomes Project using HRC panel as the reference. MAF range and mean/median/standard deviation (S.D) of genotype R2 are shown in the columns.

| POPULATION | PROTOCOL              | MAF          | MEAN R2  | MEDIAN  | S.D.     |
|------------|-----------------------|--------------|----------|---------|----------|
| AFR        | Central               | [0,0.001]    | 0.324562 | 0.1826  | 0.351192 |
| AFR        | Unphased (No augment) | [0,0.001]    | 0.246494 | 0.0377  | 0.311815 |
| AFR        | Unphased (Augmented)  | [0,0.001]    | 0.253415 | 0.0355  | 0.318106 |
| AFR        | Phased (Augmented)    | [0,0.001]    | 0.242126 | 0.0381  | 0.306552 |
| AFR        | Phased (No augment)   | [0,0.001]    | 0.225782 | 0.016   | 0.297176 |
| AFR        | RESHAPE               | [0,0.001]    | 0.266798 | 0.0899  | 0.316434 |
| AFR        | Central               | (0.001,0.01] | 0.760558 | 0.8336  | 0.226148 |
| AFR        | Unphased (No augment) | (0.001,0.01] | 0.685409 | 0.7489  | 0.249204 |
| AFR        | Unphased (Augmented)  | (0.001,0.01] | 0.706106 | 0.77245 | 0.246447 |
| AFR        | Phased (Augmented)    | (0.001,0.01] | 0.690261 | 0.7556  | 0.246895 |
| AFR        | Phased (No augment)   | (0.001,0.01] | 0.653072 | 0.714   | 0.25654  |
| AFR        | RESHAPE               | (0.001,0.01] | 0.707773 | 0.7695  | 0.233938 |
| AFR        | Central               | (0.01,0.05]  | 0.869665 | 0.9354  | 0.165407 |
| AFR        | Unphased (No augment) | (0.01,0.05]  | 0.822347 | 0.8965  | 0.193187 |
| AFR        | Unphased (Augmented)  | (0.01,0.05]  | 0.841747 | 0.9134  | 0.18617  |
| AFR        | Phased (Augmented)    | (0.01,0.05]  | 0.832918 | 0.9065  | 0.190767 |
| AFR        | Phased (No augment)   | (0.01,0.05]  | 0.797071 | 0.8714  | 0.20852  |
| AFR        | RESHAPE               | (0.01,0.05]  | 0.842118 | 0.9085  | 0.176676 |
| AFR        | Central               | (0.05,1]     | 0.939685 | 0.9766  | 0.104134 |
| AFR        | Unphased (No augment) | (0.05,1]     | 0.893279 | 0.9349  | 0.125466 |
| AFR        | Unphased (Augmented)  | (0.05,1]     | 0.916697 | 0.95655 | 0.116893 |
| AFR        | Phased (Augmented)    | (0.05,1]     | 0.914119 | 0.9553  | 0.119802 |
| AFR        | Phased (No augment)   | (0.05,1]     | 0.874965 | 0.9253  | 0.142205 |
| AFR        | RESHAPE               | (0.05,1]     | 0.928403 | 0.9678  | 0.112234 |
