# Supplementary material for: Proxy panels enable privacy-aware outsourcing of genotype imputation
Source: HighWire-hosted journal article supplement (doi:10.1101/gr.278934.124), 2025-01-10
Supplement: Supplemental_Table_S4.pdf [file Supplemental_Table_S4.pdf]

**Supplemental Table S4.** Accuracy statistics for imputation of the American (AMR) specific variant genotypes from The 1000 Genomes Project using HRC panel as the reference. MAF range and mean/median/standard deviation (S.D) of genotype R2 are shown in the columns.

| POPULATION | PROTOCOL              | MAF          | MEAN R2  | MEDIAN  | S.D.     |
|------------|-----------------------|--------------|----------|---------|----------|
| AMR        | Central               | [0,0.001]    | 0.254797 | 0       | 0.353762 |
| AMR        | Unphased (No augment) | [0,0.001]    | 0.209501 | 0       | 0.326248 |
| AMR        | Unphased (Augmented)  | [0,0.001]    | 0.206551 | 0       | 0.327434 |
| AMR        | Phased (Augmented)    | [0,0.001]    | 0.189747 | 0       | 0.312348 |
| AMR        | Phased (No augment)   | [0,0.001]    | 0.176936 | 0       | 0.303706 |
| AMR        | RESHAPE               | [0,0.001]    | 0.205978 | 0       | 0.327213 |
| AMR        | Central               | (0.001,0.01] | 0.462817 | 0.4451  | 0.301277 |
| AMR        | Unphased (No augment) | (0.001,0.01] | 0.399879 | 0.35585 | 0.293552 |
| AMR        | Unphased (Augmented)  | (0.001,0.01] | 0.405254 | 0.3717  | 0.295375 |
| AMR        | Phased (Augmented)    | (0.001,0.01] | 0.392346 | 0.3456  | 0.293841 |
| AMR        | Phased (No augment)   | (0.001,0.01] | 0.374043 | 0.3327  | 0.289655 |
| AMR        | RESHAPE               | (0.001,0.01] | 0.41068  | 0.3742  | 0.300782 |
| AMR        | Central               | (0.01,0.05]  | 0.670967 | 0.7083  | 0.257047 |
| AMR        | Unphased (No augment) | (0.01,0.05]  | 0.606    | 0.6157  | 0.268162 |
| AMR        | Unphased (Augmented)  | (0.01,0.05]  | 0.619931 | 0.6379  | 0.26883  |
| AMR        | Phased (Augmented)    | (0.01,0.05]  | 0.609523 | 0.6242  | 0.268876 |
| AMR        | Phased (No augment)   | (0.01,0.05]  | 0.582363 | 0.5872  | 0.269671 |
| AMR        | RESHAPE               | (0.01,0.05]  | 0.623651 | 0.6425  | 0.267179 |
| AMR        | Central               | (0.05,1]     | 0.932173 | 0.9757  | 0.117025 |
| AMR        | Unphased (No augment) | (0.05,1]     | 0.889763 | 0.93665 | 0.134085 |
| AMR        | Unphased (Augmented)  | (0.05,1]     | 0.911638 | 0.958   | 0.128531 |
| AMR        | Phased (Augmented)    | (0.05,1]     | 0.907852 | 0.956   | 0.132184 |
| AMR        | Phased (No augment)   | (0.05,1]     | 0.869298 | 0.9248  | 0.150083 |
| AMR        | RESHAPE               | (0.05,1]     | 0.920465 | 0.9668  | 0.126425 |
