# Supplementary material for: Proxy panels enable privacy-aware outsourcing of genotype imputation
Source: HighWire-hosted journal article supplement (doi:10.1101/gr.278934.124), 2025-01-10
Supplement: Supplemental_Table_S5.pdf [file Supplemental_Table_S5.pdf]

**Supplemental Table S5.** Accuracy statistics for imputation of the South Asian (SAS) specific variant genotypes from The 1000 Genomes Project using HRC panel as the reference. MAF range and mean/median/standard deviation (S.D) of genotype R2 are shown in the columns.

| POPULATION | PROTOCOL              | MAF          | MEAN R2  | MEDIAN | S.D.     |
|------------|-----------------------|--------------|----------|--------|----------|
| SAS        | Central               | [0,0.001]    | 0.106589 | 0      | 0.227396 |
| SAS        | Unphased (No augment) | [0,0.001]    | 0.083281 | 0      | 0.20416  |
| SAS        | Unphased (Augmented)  | [0,0.001]    | 0.084377 | 0      | 0.205999 |
| SAS        | Phased (Augmented)    | [0,0.001]    | 0.077812 | 0      | 0.195058 |
| SAS        | Phased (No augment)   | [0,0.001]    | 0.070295 | 0      | 0.185439 |
| SAS        | RESHAPE               | [0,0.001]    | 0.087956 | 0      | 0.209785 |
| SAS        | Central               | (0.001,0.01] | 0.469009 | 0.451  | 0.304859 |
| SAS        | Unphased (No augment) | (0.001,0.01] | 0.408368 | 0.3718 | 0.294082 |
| SAS        | Unphased (Augmented)  | (0.001,0.01] | 0.422739 | 0.3817 | 0.302821 |
| SAS        | Phased (Augmented)    | (0.001,0.01] | 0.404478 | 0.3729 | 0.294445 |
| SAS        | Phased (No augment)   | (0.001,0.01] | 0.381179 | 0.3331 | 0.289728 |
| SAS        | RESHAPE               | (0.001,0.01] | 0.423889 | 0.3988 | 0.297412 |
| SAS        | Central               | (0.01,0.05]  | 0.707611 | 0.7784 | 0.246036 |
| SAS        | Unphased (No augment) | (0.01,0.05]  | 0.65002  | 0.6953 | 0.255904 |
| SAS        | Unphased (Augmented)  | (0.01,0.05]  | 0.666112 | 0.7223 | 0.257023 |
| SAS        | Phased (Augmented)    | (0.01,0.05]  | 0.657885 | 0.714  | 0.256216 |
| SAS        | Phased (No augment)   | (0.01,0.05]  | 0.625359 | 0.6661 | 0.258616 |
| SAS        | RESHAPE               | (0.01,0.05]  | 0.667579 | 0.7306 | 0.252895 |
| SAS        | Central               | (0.05,1]     | 0.928836 | 0.9721 | 0.117118 |
| SAS        | Unphased (No augment) | (0.05,1]     | 0.888626 | 0.9353 | 0.13393  |
| SAS        | Unphased (Augmented)  | (0.05,1]     | 0.908261 | 0.9542 | 0.129169 |
| SAS        | Phased (Augmented)    | (0.05,1]     | 0.905804 | 0.9527 | 0.130917 |
| SAS        | Phased (No augment)   | (0.05,1]     | 0.871934 | 0.925  | 0.148996 |
| SAS        | RESHAPE               | (0.05,1]     | 0.915851 | 0.962  | 0.126128 |
