# Supplementary material for: Proxy panels enable privacy-aware outsourcing of genotype imputation
Source: HighWire-hosted journal article supplement (doi:10.1101/gr.278934.124), 2025-01-10
Supplement: Supplemental_Table_S6.pdf [file Supplemental_Table_S6.pdf]

**Supplemental Table S6.** Accuracy statistics for imputation of the East Asian (EAS) specific variant genotypes from The 1000 Genomes Project using HRC panel as the reference. MAF range and mean/median/standard deviation (S.D) of genotype R2 are shown in the columns.

| POPULATION | PROTOCOL              | MAF          | MEAN R2  | MEDIAN | S.D.     |
|------------|-----------------------|--------------|----------|--------|----------|
| EAS        | Central               | [0,0.001]    | 0.070698 | 0      | 0.176614 |
| EAS        | Unphased (No augment) | [0,0.001]    | 0.050423 | 0      | 0.146257 |
| EAS        | Unphased (Augmented)  | [0,0.001]    | 0.052452 | 0      | 0.151308 |
| EAS        | Phased (Augmented)    | [0,0.001]    | 0.049108 | 0      | 0.143034 |
| EAS        | Phased (No augment)   | [0,0.001]    | 0.043197 | 0      | 0.132062 |
| EAS        | RESHAPE               | [0,0.001]    | 0.05516  | 0      | 0.154653 |
| EAS        | Central               | (0.001,0.01] | 0.513627 | 0.5258 | 0.360618 |
| EAS        | Unphased (No augment) | (0.001,0.01] | 0.432227 | 0.3797 | 0.341158 |
| EAS        | Unphased (Augmented)  | (0.001,0.01] | 0.464234 | 0.4373 | 0.353798 |
| EAS        | Phased (Augmented)    | (0.001,0.01] | 0.454174 | 0.4218 | 0.350064 |
| EAS        | Phased (No augment)   | (0.001,0.01] | 0.416586 | 0.3552 | 0.337149 |
| EAS        | RESHAPE               | (0.001,0.01] | 0.470826 | 0.4582 | 0.349601 |
| EAS        | Central               | (0.01,0.05]  | 0.837613 | 0.9311 | 0.212088 |
| EAS        | Unphased (No augment) | (0.01,0.05]  | 0.749747 | 0.8631 | 0.264605 |
| EAS        | Unphased (Augmented)  | (0.01,0.05]  | 0.783696 | 0.8899 | 0.248312 |
| EAS        | Phased (Augmented)    | (0.01,0.05]  | 0.777151 | 0.885  | 0.247508 |
| EAS        | Phased (No augment)   | (0.01,0.05]  | 0.728637 | 0.8411 | 0.270146 |
| EAS        | RESHAPE               | (0.01,0.05]  | 0.812009 | 0.9062 | 0.224429 |
| EAS        | Central               | (0.05,1]     | 0.941314 | 0.978  | 0.106541 |
| EAS        | Unphased (No augment) | (0.05,1]     | 0.890911 | 0.9361 | 0.133839 |
| EAS        | Unphased (Augmented)  | (0.05,1]     | 0.916299 | 0.9583 | 0.122016 |
| EAS        | Phased (Augmented)    | (0.05,1]     | 0.914611 | 0.9572 | 0.124976 |
| EAS        | Phased (No augment)   | (0.05,1]     | 0.874837 | 0.9282 | 0.149393 |
| EAS        | RESHAPE               | (0.05,1]     | 0.93162  | 0.9708 | 0.114431 |
