# Supplementary material for: Proxy panels enable privacy-aware outsourcing of genotype imputation
Source: HighWire-hosted journal article supplement (doi:10.1101/gr.278934.124), 2025-01-10
Supplement: Supplemental_Table_S7.pdf [file Supplemental_Table_S7.pdf]

**Supplemental Table S7.** Accuracy statistics for imputation of the European (EUR) specific variant genotypes from The GTEx Project using the 1000 Genomes panel as the reference. MAF range and mean/median/standard deviation (S.D) of genotype R2 are shown in the columns.

| POPULATION | PROTOCOL              | MAF          | MEAN R2  | MEDIAN  | S.D.     |
|------------|-----------------------|--------------|----------|---------|----------|
| EUR        | Central               | [0,0.001]    | 0.233977 | 0       | 0.365026 |
| EUR        | Unphased (No augment) | [0,0.001]    | 0.231299 | 0       | 0.351894 |
| EUR        | Unphased (Augmented)  | [0,0.001]    | 0.23668  | 0       | 0.355497 |
| EUR        | Phased (Augmented)    | [0,0.001]    | 0.224642 | 0       | 0.349988 |
| EUR        | Phased (No augment)   | [0,0.001]    | 0.208846 | 0       | 0.340202 |
| EUR        | RESHAPE               | [0,0.001]    | 0.175822 | 0       | 0.328508 |
| EUR        | Central               | (0.001,0.01] | 0.518349 | 0.5328  | 0.327908 |
| EUR        | Unphased (No augment) | (0.001,0.01] | 0.492084 | 0.4984  | 0.310577 |
| EUR        | Unphased (Augmented)  | (0.001,0.01] | 0.505911 | 0.4992  | 0.312725 |
| EUR        | Phased (Augmented)    | (0.001,0.01] | 0.508712 | 0.5091  | 0.310536 |
| EUR        | Phased (No augment)   | (0.001,0.01] | 0.47818  | 0.4932  | 0.311389 |
| EUR        | RESHAPE               | (0.001,0.01] | 0.461137 | 0.4596  | 0.340808 |
| EUR        | Central               | (0.01,0.05]  | 0.783855 | 0.8857  | 0.245784 |
| EUR        | Unphased (No augment) | (0.01,0.05]  | 0.754869 | 0.84245 | 0.246456 |
| EUR        | Unphased (Augmented)  | (0.01,0.05]  | 0.767866 | 0.856   | 0.243042 |
| EUR        | Phased (Augmented)    | (0.01,0.05]  | 0.772962 | 0.8606  | 0.236635 |
| EUR        | Phased (No augment)   | (0.01,0.05]  | 0.741658 | 0.8277  | 0.252627 |
| EUR        | RESHAPE               | (0.01,0.05]  | 0.757369 | 0.8672  | 0.268998 |
| EUR        | Central               | (0.05,1]     | 0.953983 | 0.9879  | 0.09657  |
| EUR        | Unphased (No augment) | (0.05,1]     | 0.914368 | 0.9592  | 0.122638 |
| EUR        | Unphased (Augmented)  | (0.05,1]     | 0.936123 | 0.9748  | 0.106835 |
| EUR        | Phased (Augmented)    | (0.05,1]     | 0.93726  | 0.975   | 0.10596  |
| EUR        | Phased (No augment)   | (0.05,1]     | 0.908815 | 0.9567  | 0.12867  |
| EUR        | RESHAPE               | (0.05,1]     | 0.948163 | 0.9867  | 0.107716 |
