# Supplementary material for: Proxy panels enable privacy-aware outsourcing of genotype imputation
Source: HighWire-hosted journal article supplement (doi:10.1101/gr.278934.124), 2025-01-10
Supplement: Supplemental_Table_S8.pdf [file Supplemental_Table_S8.pdf]

**Supplemental Table S8.** Accuracy statistics for imputation of the African (AFR) specific variant genotypes from The GTEx Project using the 1000 Genomes panel as the reference. MAF range and mean/median/standard deviation (S.D) of genotype R2 are shown in the columns.

| POPULATION | PROTOCOL              | MAF          | MEAN R2  | MEDIAN | S.D.     |
|------------|-----------------------|--------------|----------|--------|----------|
| AFR        | Central               | [0,0.001]    | 0.416217 | 0      | 0.475308 |
| AFR        | Unphased (No augment) | [0,0.001]    | 0.395108 | 0      | 0.467364 |
| AFR        | Unphased (Augmented)  | [0,0.001]    | 0.417922 | 0      | 0.473056 |
| AFR        | Phased (Augmented)    | [0,0.001]    | 0.383034 | 0      | 0.466335 |
| AFR        | Phased (No augment)   | [0,0.001]    | 0.359067 | 0      | 0.460305 |
| AFR        | RESHAPE               | [0,0.001]    | 0.369465 | 0      | 0.465017 |
| AFR        | Central               | (0.001,0.01] | 0.753639 | 1      | 0.344961 |
| AFR        | Unphased (No augment) | (0.001,0.01] | 0.710121 | 1      | 0.355575 |
| AFR        | Unphased (Augmented)  | (0.001,0.01] | 0.735934 | 1      | 0.345326 |
| AFR        | Phased (Augmented)    | (0.001,0.01] | 0.729266 | 1      | 0.349617 |
| AFR        | Phased (No augment)   | (0.001,0.01] | 0.692133 | 0.832  | 0.364197 |
| AFR        | RESHAPE               | (0.001,0.01] | 0.720457 | 1      | 0.362455 |
| AFR        | Central               | (0.01,0.05]  | 0.857691 | 0.9306 | 0.192332 |
| AFR        | Unphased (No augment) | (0.01,0.05]  | 0.81554  | 0.8771 | 0.211638 |
| AFR        | Unphased (Augmented)  | (0.01,0.05]  | 0.836495 | 0.9045 | 0.201589 |
| AFR        | Phased (Augmented)    | (0.01,0.05]  | 0.838318 | 0.8991 | 0.195218 |
| AFR        | Phased (No augment)   | (0.01,0.05]  | 0.804484 | 0.8652 | 0.213216 |
| AFR        | RESHAPE               | (0.01,0.05]  | 0.838018 | 0.9152 | 0.209977 |
| AFR        | Central               | (0.05,1]     | 0.941084 | 0.9819 | 0.107367 |
| AFR        | Unphased (No augment) | (0.05,1]     | 0.908965 | 0.9554 | 0.126116 |
| AFR        | Unphased (Augmented)  | (0.05,1]     | 0.926491 | 0.9702 | 0.116397 |
| AFR        | Phased (Augmented)    | (0.05,1]     | 0.928442 | 0.97   | 0.112487 |
| AFR        | Phased (No augment)   | (0.05,1]     | 0.89557  | 0.948  | 0.136814 |
| AFR        | RESHAPE               | (0.05,1]     | 0.933297 | 0.9805 | 0.120092 |
