# Supplementary material for: Proxy panels enable privacy-aware outsourcing of genotype imputation
Source: HighWire-hosted journal article supplement (doi:10.1101/gr.278934.124), 2025-01-10
Supplement: Supplemental_Table_S9.pdf [file Supplemental_Table_S9.pdf]

**Supplemental Table S9.** Accuracy statistics for imputation of the American (AMR) specific variant genotypes from The GTEx Project using the 1000 Genomes panel as the reference. MAF range and mean/median/standard deviation (S.D) of genotype R2 are shown in the columns.

| POPULATION | PROTOCOL              | MAF          | MEAN R2  | MEDIAN  | S.D.     |
|------------|-----------------------|--------------|----------|---------|----------|
| AMR        | Central               | [0,0.001]    | 0.244904 | 0       | 0.39185  |
| AMR        | Unphased (No augment) | [0,0.001]    | 0.237338 | 0       | 0.377912 |
| AMR        | Unphased (Augmented)  | [0,0.001]    | 0.250133 | 0       | 0.386338 |
| AMR        | Phased (Augmented)    | [0,0.001]    | 0.233264 | 0       | 0.375679 |
| AMR        | Phased (No augment)   | [0,0.001]    | 0.21651  | 0       | 0.366507 |
| AMR        | RESHAPE               | [0,0.001]    | 0.194577 | 0       | 0.361407 |
| AMR        | Central               | (0.001,0.01] | 0.478059 | 0.4976  | 0.378233 |
| AMR        | Unphased (No augment) | (0.001,0.01] | 0.456549 | 0.4423  | 0.359096 |
| AMR        | Unphased (Augmented)  | (0.001,0.01] | 0.468747 | 0.45785 | 0.362038 |
| AMR        | Phased (Augmented)    | (0.001,0.01] | 0.470832 | 0.4825  | 0.362057 |
| AMR        | Phased (No augment)   | (0.001,0.01] | 0.435708 | 0.4259  | 0.35936  |
| AMR        | RESHAPE               | (0.001,0.01] | 0.430598 | 0.3891  | 0.382756 |
| AMR        | Central               | (0.01,0.05]  | 0.716628 | 0.83055 | 0.311186 |
| AMR        | Unphased (No augment) | (0.01,0.05]  | 0.663295 | 0.7488  | 0.318089 |
| AMR        | Unphased (Augmented)  | (0.01,0.05]  | 0.679138 | 0.7646  | 0.318978 |
| AMR        | Phased (Augmented)    | (0.01,0.05]  | 0.684375 | 0.7659  | 0.311142 |
| AMR        | Phased (No augment)   | (0.01,0.05]  | 0.653061 | 0.72805 | 0.317512 |
| AMR        | RESHAPE               | (0.01,0.05]  | 0.685887 | 0.7987  | 0.329716 |
| AMR        | Central               | (0.05,1]     | 0.946536 | 0.9864  | 0.112344 |
| AMR        | Unphased (No augment) | (0.05,1]     | 0.910134 | 0.9554  | 0.132106 |
| AMR        | Unphased (Augmented)  | (0.05,1]     | 0.928098 | 0.9724  | 0.123985 |
| AMR        | Phased (Augmented)    | (0.05,1]     | 0.930965 | 0.9733  | 0.12116  |
| AMR        | Phased (No augment)   | (0.05,1]     | 0.894911 | 0.9495  | 0.149169 |
| AMR        | RESHAPE               | (0.05,1]     | 0.940734 | 0.985   | 0.124182 |
