# Supplementary material for: Proxy panels enable privacy-aware outsourcing of genotype imputation
Source: HighWire-hosted journal article supplement (doi:10.1101/gr.278934.124), 2025-01-10
Supplement: Supplemental_Table_S10.pdf [file Supplemental_Table_S10.pdf]

**Supplemental Table S10.** Accuracy statistics for imputation of the South Asian (SAS) specific variant genotypes from The GTEx Project using the 1000 Genomes panel as the reference. MAF range and mean/median/standard deviation (S.D) of genotype R2 are shown in the columns.

| POPULATION | PROTOCOL              | MAF          | MEAN R2  | MEDIAN  | S.D.     |
|------------|-----------------------|--------------|----------|---------|----------|
| SAS        | Central               | [0,0.001]    | 0.154609 | 0       | 0.341588 |
| SAS        | Unphased (No augment) | [0,0.001]    | 0.157327 | 0       | 0.335179 |
| SAS        | Unphased (Augmented)  | [0,0.001]    | 0.157273 | 0       | 0.336651 |
| SAS        | Phased (Augmented)    | [0,0.001]    | 0.152381 | 0       | 0.332141 |
| SAS        | Phased (No augment)   | [0,0.001]    | 0.140565 | 0       | 0.321699 |
| SAS        | RESHAPE               | [0,0.001]    | 0.123509 | 0       | 0.309102 |
| SAS        | Central               | (0.001,0.01] | 0.479895 | 0.4992  | 0.40532  |
| SAS        | Unphased (No augment) | (0.001,0.01] | 0.440218 | 0.4402  | 0.3835   |
| SAS        | Unphased (Augmented)  | (0.001,0.01] | 0.460837 | 0.4771  | 0.388    |
| SAS        | Phased (Augmented)    | (0.001,0.01] | 0.461197 | 0.4968  | 0.389677 |
| SAS        | Phased (No augment)   | (0.001,0.01] | 0.426098 | 0.3968  | 0.383502 |
| SAS        | RESHAPE               | (0.001,0.01] | 0.431724 | 0.372   | 0.407559 |
| SAS        | Central               | (0.01,0.05]  | 0.771782 | 0.886   | 0.268082 |
| SAS        | Unphased (No augment) | (0.01,0.05]  | 0.725174 | 0.8235  | 0.281305 |
| SAS        | Unphased (Augmented)  | (0.01,0.05]  | 0.745684 | 0.8515  | 0.277714 |
| SAS        | Phased (Augmented)    | (0.01,0.05]  | 0.743893 | 0.8414  | 0.27374  |
| SAS        | Phased (No augment)   | (0.01,0.05]  | 0.711469 | 0.8063  | 0.286332 |
| SAS        | RESHAPE               | (0.01,0.05]  | 0.746392 | 0.8661  | 0.288528 |
| SAS        | Central               | (0.05,1]     | 0.941082 | 0.9835  | 0.118021 |
| SAS        | Unphased (No augment) | (0.05,1]     | 0.906981 | 0.95795 | 0.138324 |
| SAS        | Unphased (Augmented)  | (0.05,1]     | 0.924604 | 0.9717  | 0.129182 |
| SAS        | Phased (Augmented)    | (0.05,1]     | 0.927896 | 0.9714  | 0.122263 |
| SAS        | Phased (No augment)   | (0.05,1]     | 0.895611 | 0.95315 | 0.150576 |
| SAS        | RESHAPE               | (0.05,1]     | 0.933615 | 0.9817  | 0.130184 |
