# Supplementary material for: Proxy panels enable privacy-aware outsourcing of genotype imputation
Source: HighWire-hosted journal article supplement (doi:10.1101/gr.278934.124), 2025-01-10
Supplement: Supplemental_Table_S11.pdf [file Supplemental_Table_S11.pdf]

**Supplemental Table S11.** Accuracy statistics for imputation of the East Asian (EAS) specific variant genotypes from The GTEx Project using the 1000 Genomes panel as the reference. MAF range and mean/median/standard deviation (S.D) of genotype R2 are shown in the columns.

| POPULATION | PROTOCOL              | MAF          | MEAN R2  | MEDIAN  | S.D.     |
|------------|-----------------------|--------------|----------|---------|----------|
| EAS        | Central               | [0,0.001]    | 0.104799 | 0       | 0.29939  |
| EAS        | Unphased (No augment) | [0,0.001]    | 0.110967 | 0       | 0.30535  |
| EAS        | Unphased (Augmented)  | [0,0.001]    | 0.11277  | 0       | 0.307319 |
| EAS        | Phased (Augmented)    | [0,0.001]    | 0.106624 | 0       | 0.300197 |
| EAS        | Phased (No augment)   | [0,0.001]    | 0.092152 | 0       | 0.281445 |
| EAS        | RESHAPE               | [0,0.001]    | 0.08051  | 0       | 0.264959 |
| EAS        | Central               | (0.001,0.01] | 0.423259 | 0.1648  | 0.455185 |
| EAS        | Unphased (No augment) | (0.001,0.01] | 0.378932 | 0.1141  | 0.43005  |
| EAS        | Unphased (Augmented)  | (0.001,0.01] | 0.396901 | 0.1654  | 0.435286 |
| EAS        | Phased (Augmented)    | (0.001,0.01] | 0.399023 | 0.1987  | 0.435486 |
| EAS        | Phased (No augment)   | (0.001,0.01] | 0.362646 | 0.0045  | 0.428411 |
| EAS        | RESHAPE               | (0.001,0.01] | 0.383936 | 0       | 0.446291 |
| EAS        | Central               | (0.01,0.05]  | 0.72632  | 0.90465 | 0.342828 |
| EAS        | Unphased (No augment) | (0.01,0.05]  | 0.613577 | 0.6656  | 0.351359 |
| EAS        | Unphased (Augmented)  | (0.01,0.05]  | 0.653855 | 0.7488  | 0.343819 |
| EAS        | Phased (Augmented)    | (0.01,0.05]  | 0.662333 | 0.7628  | 0.338237 |
| EAS        | Phased (No augment)   | (0.01,0.05]  | 0.603952 | 0.6656  | 0.352843 |
| EAS        | RESHAPE               | (0.01,0.05]  | 0.696481 | 0.8716  | 0.35544  |
| EAS        | Central               | (0.05,1]     | 0.939134 | 0.98405 | 0.121855 |
| EAS        | Unphased (No augment) | (0.05,1]     | 0.897857 | 0.9512  | 0.145866 |
| EAS        | Unphased (Augmented)  | (0.05,1]     | 0.918886 | 0.9686  | 0.134592 |
| EAS        | Phased (Augmented)    | (0.05,1]     | 0.921825 | 0.9683  | 0.128867 |
| EAS        | Phased (No augment)   | (0.05,1]     | 0.884987 | 0.9462  | 0.157176 |
| EAS        | RESHAPE               | (0.05,1]     | 0.931654 | 0.9823  | 0.134589 |
